# Supplementary material
Source: PubMed Central journal article supplement (PMC4136707)
Supplement: NIHMS601291-supplement-S1-6.pdf [file NIHMS601291-supplement-S1-6.pdf]

## Supplementary Materials for

### Up-Regulation of PD-L1, IDO, and T<sub>regs</sub> in the Melanoma Tumor Microenvironment Is Driven by CD8<sup>+</sup> T Cells

Stefani Spranger, Robbert M. Spaapen, Yuanyuan Zha, Jason Williams, Yuru Meng, Thanh T. Ha, Thomas F. Gajewski\*

\*Corresponding author. E-mail: tgajewsk@medicine.bsd.uchicago.edu

Published 28 August 2013, *Sci. Transl. Med.* **5**, 200ra116 (2013)  
DOI: 10.1126/scitranslmed.3006504

#### The PDF file includes:

- Fig. S1. Costaining of CD4 and FoxP3 in human melanoma sections.
- Fig. S2. Expression level of IDO, PD-L1, and MHC I/II in B16 tumors in vitro and in vivo.
- Fig. S3. Lack of T<sub>reg</sub> conversion from CD25-depleted T cells.
- Fig. S4. Characterization of TILs compared to in vitro-primed CD8 T cells.
- Fig. S5. CCR4 expression on human CD4 T cells and T<sub>regs</sub>.
- Fig. S6. Suppressive functional capacity of human CD25<sup>hi</sup> T<sub>regs</sub>.

**A**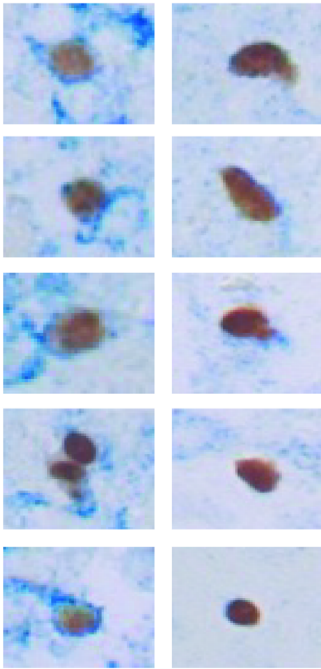**B**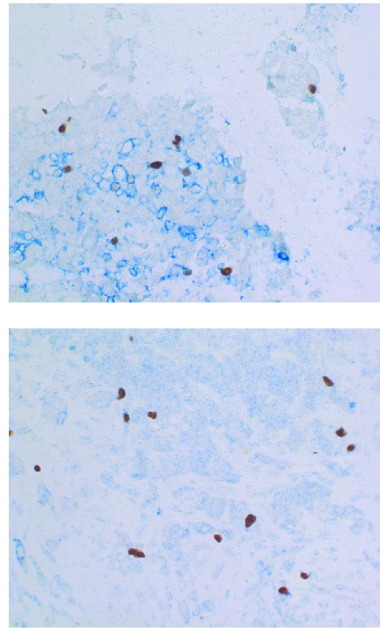

Suppl. Fig 1

**Figure S1. Costaining of CD4 and FoxP3 in human melanoma sections.**

Immunohistochemistry staining for CD4 (blue) and FoxP3 (brown) in human melanoma tissue samples (400x). Left panel depicts zoom-in images out of the tumor shown on the right. All FoxP3<sup>+</sup> cells were identified to have detectable CD4 staining.

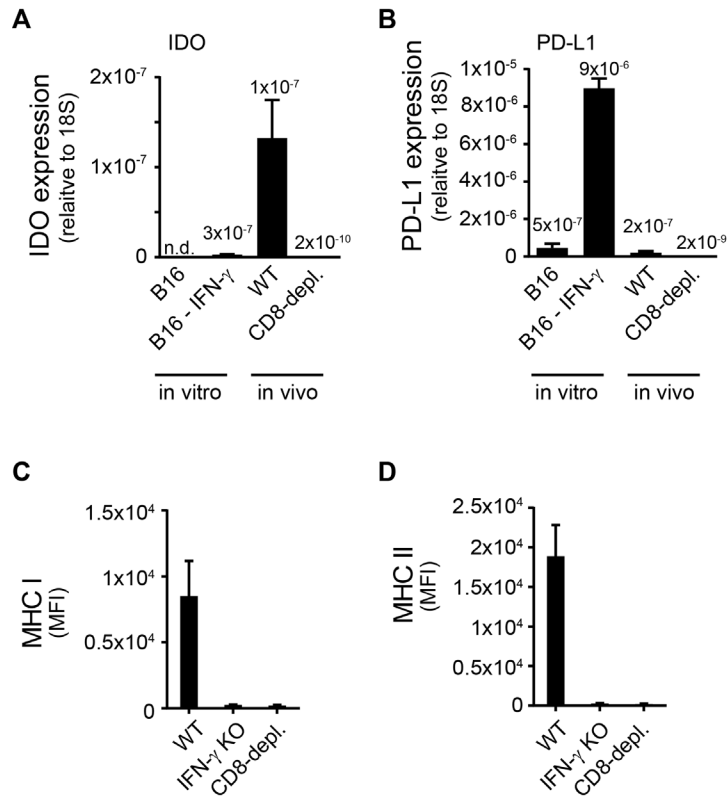

Suppl. Fig 2

**Figure S2. Expression level of IDO, PD-L1, and MHC I/II in B16 tumors in vitro and in vivo.**

A-B. Quantitative RT-PCR for IDO and PD-L1 comparing parental B16 untreated (B16) or treated with IFN- $\gamma$  (B16-IFN- $\gamma$ ) to in vivo injected B16 cell either into wild type mice (WT) or CD8-depleted mice (CD8-depl). C-D. Flow cytometric analysis of MHC-class I (C) and MHC-class II expression (D) assessed in B16-tumors transplanted either in wild type (WT), IFN- $\gamma$ -knock out (IFN- $\gamma$ -KO) or CD8-depleted mice (CD8-depl).

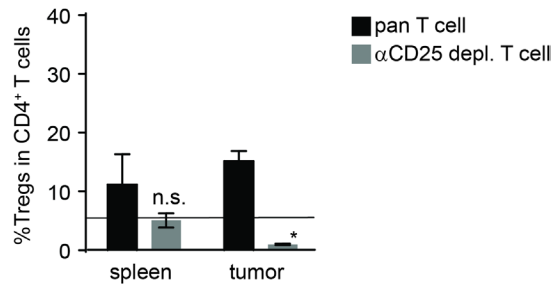

Suppl. Fig 3

**Figure S3. Lack of T<sub>reg</sub> conversion from CD25-depleted T cells.** B16 tumors were engrafted into Rag2<sup>-/-</sup> mice (day 0) prior to transfer either pan T cells (3x10<sup>6</sup>) or alphaCD25-depleted T cells (3x10<sup>6</sup>) (day1). On day 7 spleen, tumor-draining lymph node and tumor were harvested and analyzed for the amount of FoxP3-positive CD4 T cells (CD3<sup>+</sup>, CD4<sup>+</sup>). Depicted are means with SEM of 3 mice each. Significance was tested with Mann-Whitney-U test with \* = 0.03.

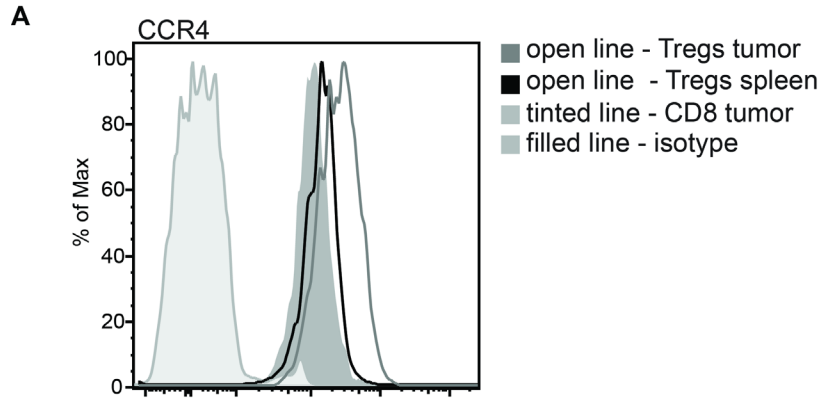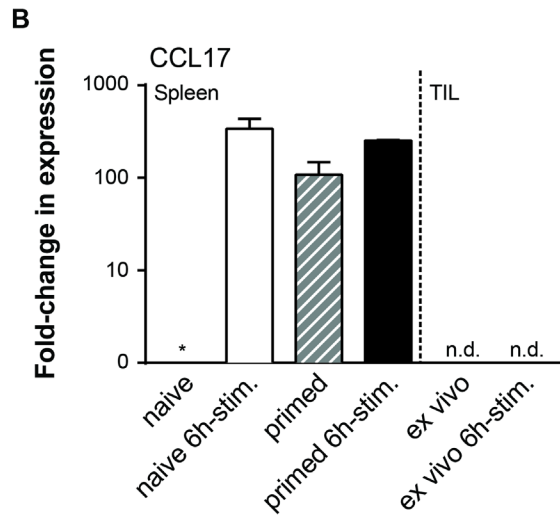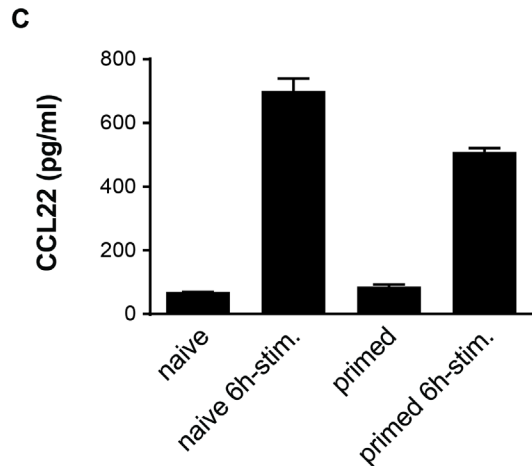

Suppl. Fig 4

**Figure S4. Characterization of TILs compared to in vitro-primed CD8 T cells.** A. CCR4 expression on Tregs, isolated from spleen (black open line) or tumor (grey open line), was compared to the expression on CD8<sup>+</sup> tumor-infiltrating lymphocytes (tinted line). B. Expression

of CCL17 in CD3/CD28-activated naïve CD8<sup>+</sup>CD62L<sup>+</sup> lymphocytes was assessed using quantitative RT-PCR. Depicted is fold-change of 6h-activated, primed (7-day stimulation) and restimulated primed cells (primed 6h-stim) relative to naïve cells. Tumor-infiltrating CD8<sup>+</sup> T cells were isolated via fluorescence-activated cell sorting and analyzed for the expression of CCL17 with expression being below detection levels (n.d.). Data are shown in mean with SEM (n=3).

C. Amount of secreted CCL22 was assessed using a CCL22-specific ELISA. Supernatants analyzed were harvested from non-stimulated cells (naïve) or CD3/CD28 stimulated cells (6h-stim) as well as 7-day stimulated cells (primed) and restimulated primed cells (primed 6h-stim). Depicted are means with SEM (n=2).

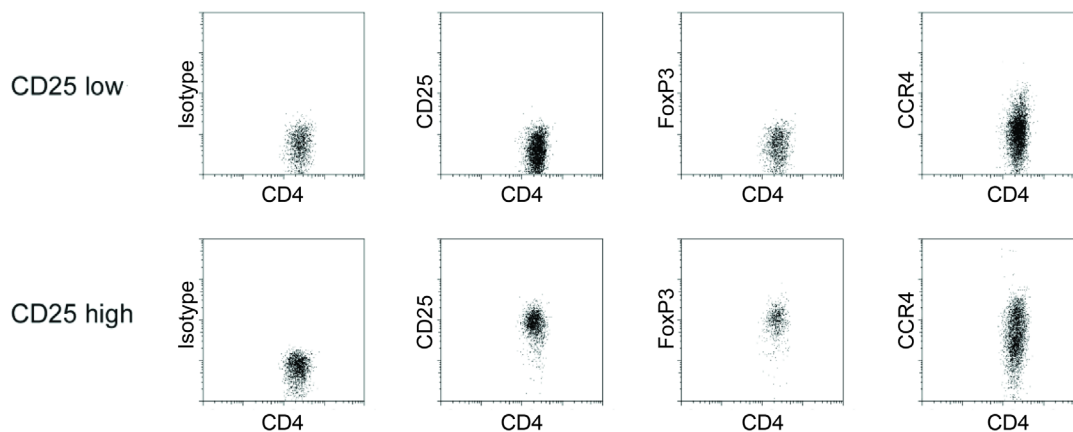

Suppl. Fig 5

**Figure S5. CCR4 expression on human CD4 T cells and T<sub>regs</sub>.** Human CD25<sup>hi</sup>CD4<sup>+</sup> T cells express CCR4. Flow cytometry was performed using an anti-CCR4 mAb after flow cytometric sorting of CD4<sup>+</sup>CD25<sup>+</sup> T cells from normal donor PBMCs.

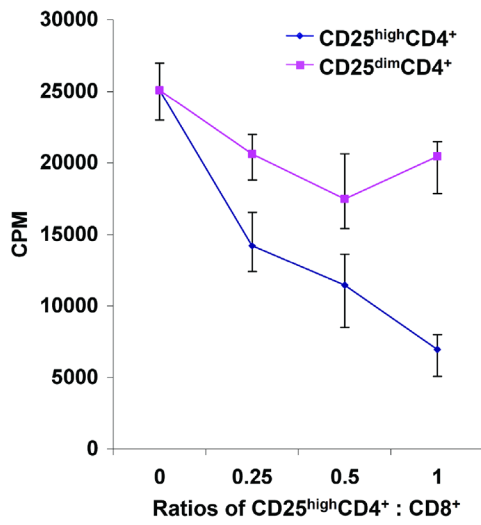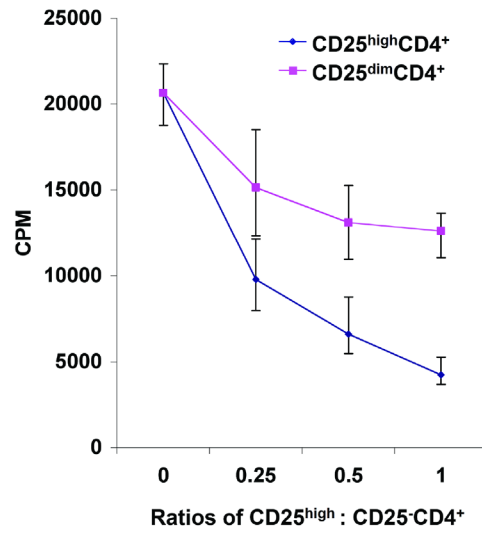

Suppl. Fig 6

**Figure S6. Suppressive functional capacity of human CD25<sup>hi</sup> T<sub>regs</sub>.** Human CD25<sup>hi</sup>CD4<sup>+</sup> T cells show suppressive function against CD4<sup>+</sup> and CD8<sup>+</sup> conventional T cells in vitro. Sorted CD25<sup>dim</sup> cells are shown for comparison.
